# Supplementary material for: Membrane-immobilized transaminases for the synthesis of enantiopure amines
Source: Royal Society of Chemistry journal article supplement (doi:10.1039/d4su00293h), 2024-01-01
Supplement: d4su00293h1.xlsx [file d4su00293h1.xlsx]

## Sheet: Feuil1
Method		A - Reductive amination of imines					Method	B - Reductive amination of ketones					Method	C - Solvent-switch assisted chiral resolution					Method	D - Biocatalytic transamination (kinetic resolution) using immobilized TA_PP							Method	E - Biocatalytic transamination (kinetic resolution) using soluble TAs
		prep.	reaction i	reaction f					reaction i	reaction f					reaction i	reaction f					reaction i	reaction f							reaction i	reaction f
Solvent		i-PrOH	i-PrOH	i-PrOH			Solvent		TFE	TFE			Solvent		i-PrOH	i-PrOH			Solvent		H2O	H2O					Solvent		H2O	H2O
(mL)		6	2	2			(mL)		0.4	0.4			(mL)		4.84	4.84			(mL)		5	5					(mL)		5	5
(L)		0.006	0.002	0.002			(L)		0.0004	0.0004			(L)		0.00484	0.00484			(L)		0.005	0.005					(L)		0.005	0.005
(g/mL)		0.781	0.781	0.781			(g/mL)		1.39	1.39			(g/mL)		0.781	0.781			(g/mL)		HEPES buffer	DMSO					(g/mL)		HEPES buffer	DMSO
(g)			1.562	1.562			(g)		0.556	0.556			(g)		3.78004	3.78004			(g)	0.07075	0.1415	0.000165					(g)		0.1415	0.000165
							(g/mol)		100	100			(g/mol)		60	60			(g/mol)		283						(g/mol)		283
							(mol)		0.00556	0.00556			(mol)		0.0630007	0.0630007			(mol)	if 0.05 M	0.0005						(mol)		0.0005
Reactant 1			Imine	Imine			Reactant 1		Ketone (BAP)	Ketone (BAP)			Reactant 1		R,S-MBA	R,S-MBA			Reactant 1		R,S-BMBA	R,S-BMBA					Reactant 1		R,S-BMBA	R,S-BMBA
(g)			0.03114	0.001557			(g)		0.0398	0.004776			(g)		0.125	0.03751			(g)		0.01	0.005					(g)		0.01	0.005
(g/L)			15.57	0.7785			(g/L)		99.5	11.94			(g/L)		25	7.75			(g/L)		2	1					(g/L)		2	1
(g/mol)			155.7				(g/mol)		199				(g/mol)		121				(g/mol)		200						(g/mol)		200
(mol/L)			0.1	0.005			(mol/L)		0.5	0.06			(mol/L)		0.206612	0.0640496			(mol/L)		0.01	0.005					(mol/L)		0.01	0.005
(mol)			0.0002				(mol)		0.0002	2.4e-05			(mol)		0.001	0.00031			(mol)		5e-05	2.5e-05					(mol)		5e-05	2.5e-05
Reactant 2			H2	H2			Reactant 2		NH4OAc	NH4OAc			Reactant 2		resolving agent (S-TPA)				Reactant 2		pyruvate	pyruvate					Reactant 2		pyruvate	pyruvate
(atm)			10	?			(g)		0.0308	0.017248			(g)		0.319	0.09889			(g)		0.0055	0.00275					(g)		0.0055	0.00275
(Pa)			1.013e+06	?			(g/L)		77	43.12			(g/L)		65.9091	20.4318			(g/L)		1.1	0.55					(g/L)		1.1	0.55
(g/mol)			2	2			(g/mol)		77				(g/mol)		319				(g/mol)		110						(g/mol)		110
(K)			298	298			(mol/L)		1	0.56			(mol/L)		0.206612	0.0640496			(mol/L)		0.01	0.005					(mol/L)		0.01	0.005
(m^3)			?	?			(mol)		0.0004	0.000224			(mol)		0.001	0.00031			(mol)		5e-05	2.5e-05					(mol)		5e-05	2.5e-05
(mol)			?	?
							Reactant 3		H2 (57 bar, 100 °C but no info on volume)
							Mass balance
							(mol cat)		3.09548e-05	3.09548e-05	0.5
							(mol solv + reactants)		0.00616	0.006336	99.5
							(mol TOT syst)		0.00619095	100	100
Reaction efficiency							Reaction efficiency						Reaction efficiency						Reaction efficiency								Reaction efficiency
ee (%)			90				ee (%)		95				ee (%)		69				ee (%)		100						ee (%)		100
yield (%)			95				yield (%)		88				yield (%)		69				yield (%)		50						yield (%)		50
Total products			R,S-MBA.HCl		check		Total amine product		R,S-BMBA				Total amine product		R,S-MBA:S-TPA				Keto by-product (BAP)								Keto by-product (BAP)
(mol/L)			0	0.095	0.095		(mol/L)		0	0.44			(mol/L)		0	0.142562			(mol/L)		0	0.005					(mol/L)		0	0.005
(g/mol)			157.7				(g/mol)		200				(g/mol)		440				(g/mol)		199						(g/mol)		199
							(mol)			0.000176			(mol)			0.00069			(mol)			2.5e-05					(mol)			2.5e-05
																			(g)			0.004975					(g)			0.004975
Target product			S-MBA.HCl				Target product		R-BMBA				Target product		S-MBA:S-TPA				Target product		R-BMBA						Target product		R-BMBA
(g)				0.0269667			(g)			0.03344			(g)			0.209484			(g)			0.005					(g)			0.005
(g/L)			0	13.4833			(g/L)		0	83.6			(g/L)		0	43.2818			(g/L)		0	1					(g/L)		0	1
(mol/L)			0	0.0855			(mol/L)		0	0.418			(mol/L)		0	0.0983678			(mol/L)		0	0.005					(mol/L)		0	0.005
Undesired product			R-MBA.HCl				Undesired product		S-BMBA				Undesired product		R-MBA:S-TPA				Undesired product		S-BMBA						Undesired product		S-BMBA
(g)				0.0029963			(g)			0.00176			(g)			0.094116			(g)			0					(g)			0
(g/L)			0	1.49815			(g/L)		0	4.4			(g/L)		0	19.4455			(g/L)		0	0					(g/L)		0	0
(mol/L)			0	0.0095			(mol/L)		0	0.022			(mol/L)		0	0.0441942			(mol/L)		0	0					(mol/L)		0	0
By product							By products		HOAc	HOAc	+ H20 (neglected in E-factor calculation)								By product		L-alanine	L-alanine					By product		L-alanine	L-alanine
(g)			0	/			(g)		0	0.01056									(g)		0	0.002225					(g)		0	0.002225
(g/L)			0	/			(g/L)		0	26.4									(g/L)		0	0.445					(g/L)		0	0.445
(mol/L)			0	/			(mol/L)		0	0.44									(mol/L)		0	0.005					(mol/L)		0	0.005
							(g/mol)		60										(g/mol)		89						(g/mol)		89
Catalyst	1 eq	[Rh(COD)Cl]2	[Rh(COD)Cl]2 (dissolved in medium)				Catalyst	0.5 mol %	Ru(OAc)2(Ligand) (dissolved in medium)										Catalyst		TA_immPP	PLP					Catalyst		TA free	PLP
(g)		0.001	0.001	0.001			(g)		0.03696										(g)			0.001235					(g)		0.00125	0.001235
(g/L)		0.5	0.5	0.5			(g/L)		92.4										(g/L)			0.247					(g/L)		0.25	0.247
(mol/L)		0.001	0.001	0.001			(mol/L)		0.0773869										(mol/L)			0.001					(mol/L)			0.001
							(mol)		3.09548e-05										(mol)								(mol)
							(g/mol Ru(Oac)2)		801.7										(g/mol PLP)			247					(g/mol PLP)			247
							(g/mol Ar group)		219
Ligand		L6 (1.1 eq)	L6 (1.1 eq)				(g/mol ligand)		1194
(g)			0.0019492	0.0019492
(g/L)			0.9746	0.9746
(g/mol)		886	886
(mol/L)			0.0011	0.0011
E factor reaction							E factor reaction						E factor reaction						E factor reaction								E factor reaction																		E factor reaction
(g waste/g target)				58.2015			(g waste/g target)		18.7591				(g waste/g target)		19.1449				(g waste/g target)		31.57	with PLP addition (HEPES 0.1M)					(g waste/g target)		31.82	with PLP addition															(g waste/g target)		#REF!	with PLP addition
																					31.323	without PLP addition (HEPES 0.1M)							17.67	with PLP addition (if HEPES was 0.05M)																		if FMBA:DPPA is the prod
																					17.173	without PLP addition (HEPES 0.05M)
[truncated: 2 more columns]
